# Supplementary material for: Lactobacillus-derived indole-3-lactic acid ameliorates colitis in cesarean-born offspring via activation of aryl hydrocarbon receptor
Source: PubMed Central journal article supplement — iScience. 2023 Oct 19;26(11):108279. doi: 10.1016/j.isci.2023.108279 (PMC10656274; doi:10.1016/j.isci.2023.108279), 2023-10-19
Supplement: mmc1.pdf [file mmc1.pdf]

**Supplemental information**

***Lactobacillus*-derived indole-3-lactic  
acid ameliorates colitis in cesarean-born  
offspring via activation of aryl hydrocarbon receptor**

**Yanan Xia, Chang Liu, Ruijia Li, Mengqi Zheng, Bingcheng Feng, Jiahui Gao, Xin Long, Lixiang Li, Shiyang Li, Xiuli Zuo, and Yanqing Li**

**Table. S1 Primer sequences for qRT-PCR, Related to STAR Methods.**

| Gene          | Accession No |         | Sequence (5'-3')        |
|---------------|--------------|---------|-------------------------|
| <i>Gapdh</i>  | NM_008084    | Forward | CATCACTGCCACCCAGAAGACTG |
|               |              | Reverse | ATGCCAGTGAGCTTCCCGTTCAG |
| <i>Ii1b</i>   | NM_008361    | Forward | TGGACCTTCCAGGATGAGGACA  |
|               |              | Reverse | GTTTCATCTCGGAGCCTGTAGTG |
| <i>Tnf</i>    | NM_013693    | Forward | GGTGCCTATGTCTCAGCCTCTT  |
|               |              | Reverse | GCCATAGAACTGATGAGAGGGAG |
| <i>Ii22</i>   | NM_016971    | Forward | GCTTGAGGTGTCCAACCTTCCAG |
|               |              | Reverse | ACTCCTCGGAACAGTTTCTCCC  |
| <i>Cyp1a1</i> | NM_001136059 | Forward | CATCACAGACAGCCTCATTGAGC |
|               |              | Reverse | CTCCACGAGATAGCAGTTGTGAC |
| <i>Fmo2</i>   | NM_018881    | Forward | GCATAGGTCTCATCCAGCCTCT  |
|               |              | Reverse | TAGTCGTCTCCGAAGGCAAGCT  |
| <i>Kit</i>    | NM_001122733 | Forward | GAGTTCCATAGACTCCAGCGTC  |
|               |              | Reverse | AATGAGCAGCGGCGTGAACAGA  |

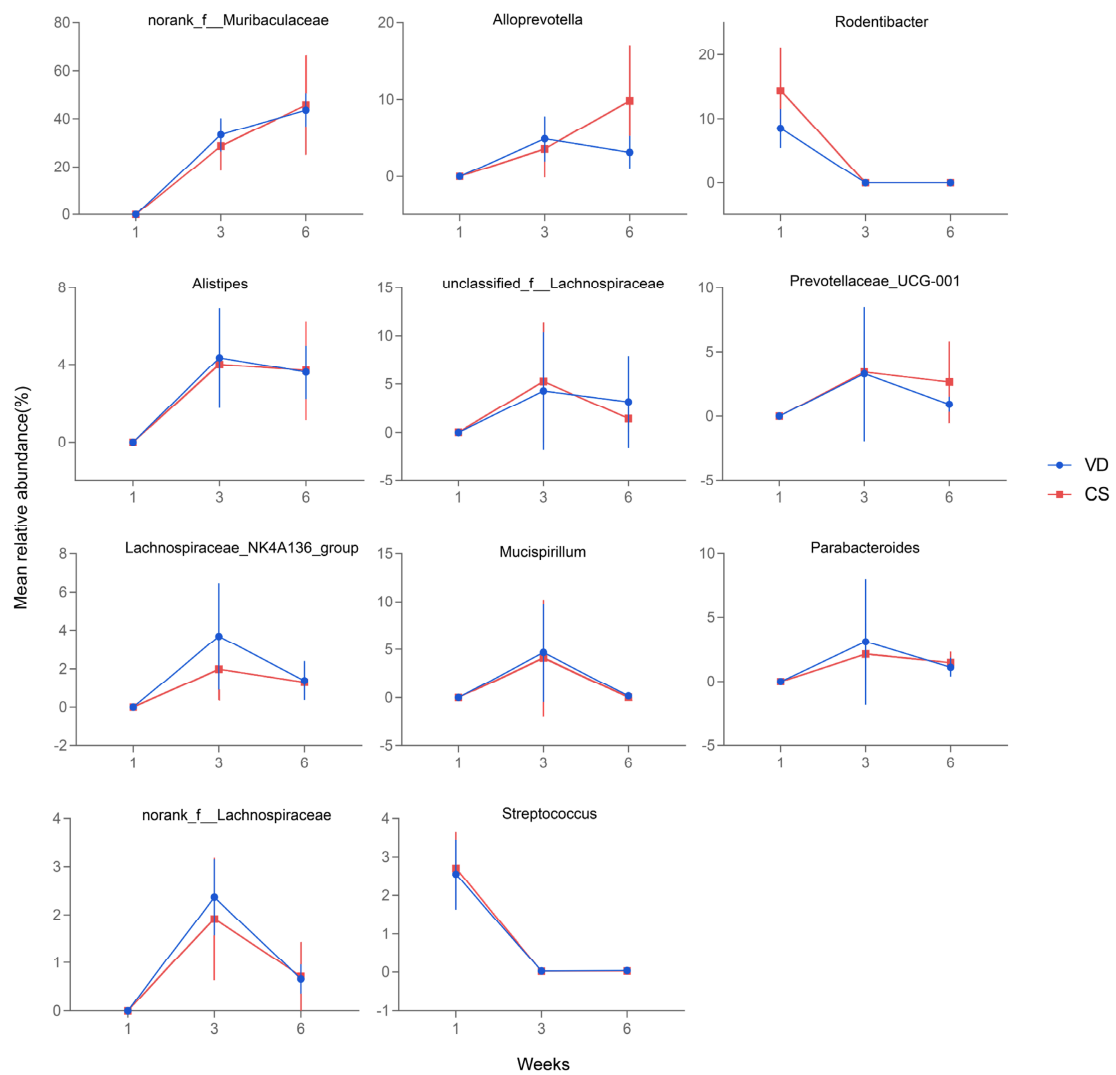

**Figure S1. Temporal development of microbiota on genus level in VD and CS mice, Related to Figure 1.**

The group means and standard errors are shown. Significance of the difference between CS group to VD group was tested at 1, 3, and 6 weeks (n =5 per group).

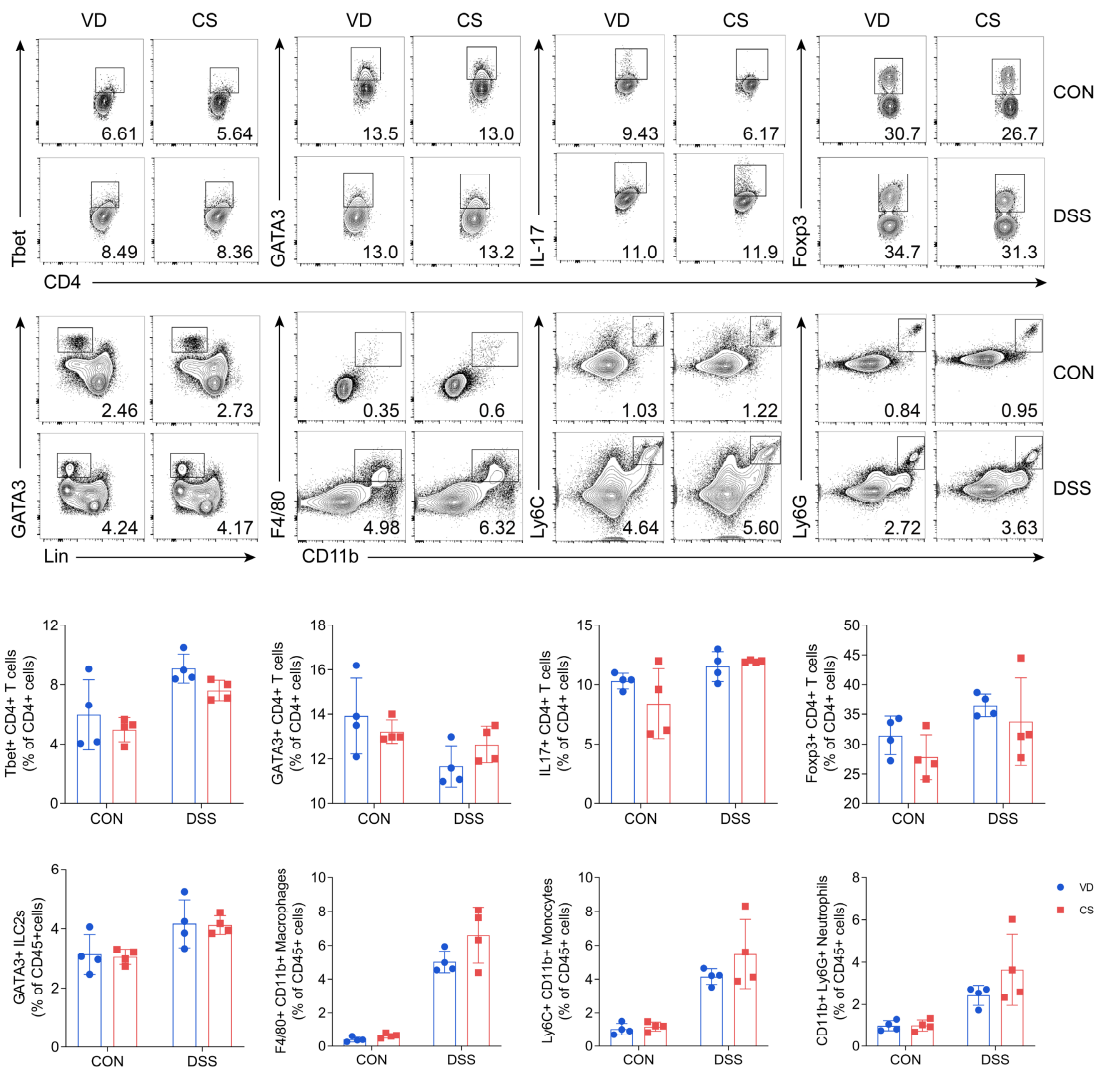

**Figure S2. Myeloid cells, CD4<sup>+</sup> T cells, and GATA<sup>+</sup> ILC2s in colonic lamina propria are not affected by CS, Related to Figure 3.**

Representative flow cytometry plots and percentage of colonic myeloid cells (F4/80<sup>+</sup> CD11b<sup>+</sup> Macrophages, Ly6C<sup>+</sup> CD11b<sup>+</sup> Monocytes, and Ly6G<sup>+</sup> CD11b<sup>+</sup> Neutrophils), T cell populations (Tbet<sup>+</sup> CD4<sup>+</sup> Th1, GATA3<sup>+</sup> CD4<sup>+</sup> Th2, IL17<sup>+</sup> CD4<sup>+</sup> Th17, and Foxp3<sup>+</sup> CD4<sup>+</sup> Treg) and ILC2s (Lin<sup>-</sup> GATA3<sup>+</sup>) from VD and CS mice at steady state or after DSS administration (n = 4 per group). Data shown as the mean ± SEM. One dot represents one mouse.

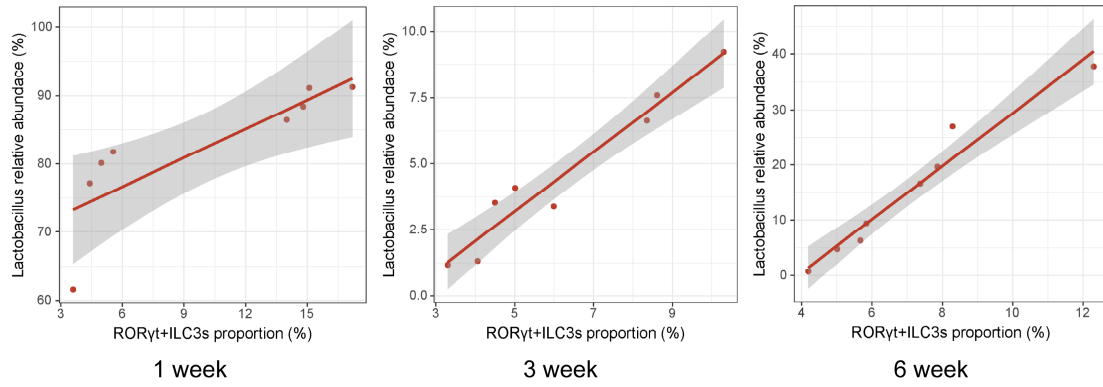

**Figure S3. Microbiome associated with immune cells, Related to Figure 4.**

Correlation of genus *Lactobacillus* relative abundance and ILC3s proportion at week 1 ( $R = 0.69$ ,  $P = 0.0105$ ), week 3 ( $R = 0.94$ ,  $P = 2.54e-05$ ), and week 6 ( $R = 0.94$ ,  $P = 5.56e-05$ ). Linear regression curve fits are shown with colored mean line and 95% CI indicated in grey shading.

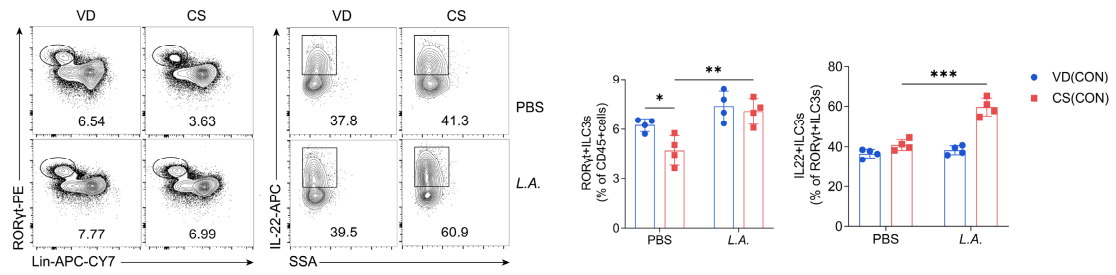

**Figure S4. Supplementation with *L. acidophilus* partially restores ILC3s in CS mice at steady state, Related to Figure 5.** Representative flow cytometry plots and percentage of colonic ILC3s and IL-22+ILC3s from VD and CS mice with different treatment (n = 4 per group). Data shown as the mean ± SEM. One dot represents one mouse. \**P* < 0.05, \*\**P* < 0.01 and \*\*\**P* < 0.001.
